1 MEK1/2 inhibition decreases pro-inflammatory responses in macrophages from people with  
2 cystic fibrosis and mitigates severity of illness in experimental murine methicillin-resistant  
3 *Staphylococcus aureus* infection

4  
5 Mithu De<sup>1,2</sup>, Katherine B. Hisert<sup>3</sup>, W. Conrad Liles<sup>4,6</sup> Anne M. Manicone<sup>5,6</sup>, Emily A. Hemann<sup>2</sup>,  
6 and Matthew E. Long<sup>1,2,\*</sup>

7  
8 <sup>1</sup>Department of Internal Medicine, Division of Pulmonary, Critical Care, and Sleep Medicine, and  
9 the <sup>2</sup>Department of Microbial Infection and Immunity, The Ohio State University, Columbus, OH;  
10 <sup>3</sup>Department of Medicine, National Jewish Health, Denver, CO; Department of Medicine,  
11 <sup>4</sup>Division of Infectious Diseases and <sup>5</sup>Division of Pulmonary, Critical Care, and Sleep Medicine,  
12 and <sup>6</sup>Center for Lung Biology, University of Washington, Seattle, WA.

13  
14 \*Corresponding Author:

15  
16 Matthew E. Long  
17 473 W. 12<sup>th</sup> Ave  
18 DHLRI Room 201  
19 Columbus, OH 43210

20  
21 Email: [Matthew.Long@osumc.edu](mailto:Matthew.Long@osumc.edu)

22  
23

24 **ABSTRACT**

25 Chronic pulmonary bacterial infections and associated inflammation remain a cause of morbidity  
26 and mortality in people with cystic fibrosis (PwCF) despite new modulator therapies. Therapies  
27 targeting host factors that dampen detrimental inflammation without suppressing immune  
28 responses critical for controlling infections remain limited, while the acquisition of antibiotic  
29 resistance bacterial infections is an increasing global problem, and a significant challenge in CF.  
30 Pharmacological compounds targeting the mammalian MAPK proteins MEK1 and MEK2,  
31 referred to as MEK1/2 inhibitor compounds, have potential combined anti-microbial and anti-  
32 inflammatory effects. Here we examined the immunomodulatory properties of MEK1/2 inhibitor  
33 compounds PD0325901, trametinib, and CI-1040 on CF innate immune cells. Human CF  
34 macrophage and neutrophil phagocytic functions were assessed by quantifying phagocytosis of  
35 serum opsonized pHrodo red *E. coli*, *Staphylococcus aureus*, and zymosan bioparticles.  
36 MEK1/2 inhibitor compounds reduced CF macrophage pro-inflammatory cytokine production  
37 without impairing CF macrophage or neutrophil phagocytic abilities. Wild-type C57BL6/J and  
38 *Cftr*<sup>Δm1kth</sup> (F508del homozygous) mice were used to evaluate the in vivo therapeutic potential of  
39 PD0325901 compared to vehicle treatment in an intranasal methicillin-resistant *Staphylococcus*  
40 *aureus* (MRSA) infection with the community-acquired MRSA strain USA300. In both wild-type  
41 and CF mice, PD0325901 reduced infection related weight loss compared to vehicle treatment  
42 groups but did not impair clearance of bacteria in lung, liver, or spleen 1 day after infection. In  
43 summary, this study provides the first data evaluating the therapeutic potential of MEK1/2  
44 inhibitor to modulate CF immune cells, and demonstrates that MEK1/2 inhibitors dampen pro-  
45 inflammatory responses without impairing host defense mechanisms mediating pathogen  
46 clearance.

47

48

## 49 INTRODUCTION

50 Mutations in the cystic fibrosis transmembrane conductance regulator (CFTR) that impair this  
51 ion channel's function result in the disease cystic fibrosis (CF). CF has many pathophysiological  
52 manifestations; however CF pulmonary disease remains the main driver of morbidity and  
53 mortality. Decades of investment in preclinical research have recently culminated in  
54 breakthrough new therapeutic highly effective modulator therapies (HEMT) that restore CFTR  
55 function and have rapidly changed the landscape of CF clinical disease and outcomes.  
56 However, despite the significant improvements in a majority of people with CF (PwCF) who  
57 have access to HEMT, established chronic bacterial colonization is not eradicated in many  
58 PwCF receiving modulator therapy, and is anticipated to remain a healthcare challenge for  
59 PwCF<sup>1</sup>. In addition, there remains a significant minority of PwCF who are not eligible for current  
60 modulator therapies in whom improved therapies to mitigate lung damage caused by chronic  
61 airway infection and inflammation are still needed. Novel strategies to alleviate pulmonary  
62 inflammation and infection are essential to address these gaps in care.

63  
64 Innate immune cells, including monocytes, macrophage, and neutrophils, that reside in the lung  
65 or are recruited during infection or injury are critical for eliminating infections and resolving the  
66 inflammatory response. However, the accumulation of inflammatory cells in the CF lung,  
67 especially neutrophils, contributes to tissue pathology<sup>2</sup>, and therapeutic approaches to reduce  
68 the tissue damaging effects of innate immune cells in the CF lung have been elusive. Our  
69 previous studies and others' have demonstrated that targeted inhibition of mammalian protein  
70 kinases MEK1/2 is a promising therapeutic strategy to reduce detrimental inflammation during  
71 the context of lung injury and infection<sup>3, 4, 5</sup>. Development of small molecules to inhibit the  
72 MEK1/2-ERK1/2 pathway has taken place over the last several decades due to the high levels  
73 of over-activation of this pathway in several types of human cancer<sup>6</sup>. Four different MEK1/2  
74 inhibitor compounds are currently FDA approved, with several additional compounds under

75 investigation in clinical trials<sup>7</sup>. Furthermore, novel therapeutic applications of MEK1/2 inhibitor  
76 compounds, including administration during respiratory viral infections, is an active area of  
77 preclinical and translational research<sup>8, 9, 10</sup>. The current study was undertaken to determine  
78 whether MEK1/2 inhibitor compounds can reduce phagocyte-mediated inflammation in CF  
79 without impairing phagocyte host defense mechanisms. This study utilized primary human  
80 blood-derived macrophages and neutrophils from PwCF to examine how administration of  
81 MEK1/2 inhibitor compounds modulate CF macrophage pro-inflammatory responses to LPS and  
82 CF macrophage and neutrophil phagocytic abilities. Wild-type C57BL6/J and *Cfr*<sup>tm1kth</sup> (F508del  
83 homozygous) mice were used to evaluate if delivery of a MEK1/2 inhibitor impaired host  
84 defense following infection with methicillin-resistant *Staphylococcus aureus* (MRSA).

85

## 86 **METHODS**

87 *Reagents.* The MEK1/2 inhibitor compounds PD0325901 (catalog # S1036), CI-1040 (catalog #  
88 S1020), and trametinib (catalog # S2673) were purchased from Selleck for use in in vitro cell  
89 culture experiments. PD0325901 and trametinib were used at 0.5  $\mu$ M and CI-1040 was used at  
90 10  $\mu$ M. PD0325901 (catalog # PZ0162) used for in vivo experiments was from Sigma.  
91 Recombinant human M-CSF was from Peprotech (catalog # 300-25). Ficoll Paque Plus (catalog  
92 # 17-1440-03) was from Cytiva. Human AB serum was from Sigma (catalog # H6914). LPS from  
93 *Pseudomonas aeruginosa* was from Sigma (catalog # L8643). The pHrodo Red *E. coli* (catalog #  
94 P35361), *S. aureus* (catalog # A10010), and zymosan (catalog # P35364) bioparticles were  
95 from ThermoFisher Scientific. Antibodies used in these studies are listed in Supplemental Table  
96 1.

97 *Animal Ethics and Mouse Infection.* The Institutional Animal Care and Use Committee at The  
98 Ohio State University approved all studies (OSU IACUC #2020A00000081). *Cfr*<sup>tm1kth</sup> F508del  
99 homozygous mice were acquired from the Case Western University Cystic Fibrosis Mouse  
100 Model Core. Mice were maintained ad libitum on golyteyl drinking water (25 mM sodium

101 chloride, 10 mM potassium chloride, 40 mM sodium sulfate, 20 mM sodium bicarbonate, 18 mM  
102 PEG 3350). C57BL/6J wild-type mice were obtained from Jackson Laboratories. For infection,  
103 an overnight culture of methicillin-resistant *S. aureus* USA300 grown in BHI was sub-cultured to  
104 mid-logarithmic phase. Bacteria were washed twice with sterile PBS and diluted so that  $1 \times 10^7$   
105 colony forming units (CFU) were delivered in a 50  $\mu$ l inoculum. Mice were anesthetized by i.p.  
106 injection of ketamine/xylazine. Anesthetized mice were provided i.p. injection of sterile PBS  
107 containing the MEK1/2 inhibitor PD0325901 (20 mg/kg) or vehicle (DMSO) immediately prior to  
108 infection by intranasal delivery of the 50  $\mu$ l inoculum. Animals were monitored for recovery from  
109 anesthesia and weight loss was measured daily. CF mice were sacrificed 24 hours after  
110 infection and lung, liver, and spleens were collected, homogenized in 1 ml of sterile PBS with  
111 the Precellys lysing kit beads (catalog # P000912-LYSK1-A), and serial dilutions of tissue  
112 homogenates were plated on TSA and incubated overnight at 37°C to allow colony growth.  
113 Colonies were enumerated and the total CFU recovered were calculated and normalized per  
114 gram of tissue collected.

#### 115 *Cell culture.*

116 Human subjects research was approved by the Institutional Review Board at Nationwide  
117 Children's Hospital and The Ohio State University. Blood donors were consented at Nationwide  
118 Children's Hospital by clinical research coordinators supported by the Cure CF Columbus  
119 Research Development Program. Human blood was collected into EDTA-vacutainer tubes  
120 following approved IRB protocols and samples were de-identified. Peripheral blood  
121 mononuclear cells (PMBC) were isolated by Ficoll gradient centrifugation and differentiated to  
122 monocyte-derived macrophages for 7-10 days by incubation with 20 ng/ml recombinant human  
123 M-CSF. Macrophages were seeded into 24-well tissue culture plates at a density of 300,000  
124 cells/well in HEPES-buffered RPMI-1640 containing 10% HI-FBS, penicillin/streptomycin, L-  
125 glutamine. Neutrophils were also isolated from peripheral blood by Ficoll gradient centrifugation  
126 and used immediately following isolation<sup>11</sup>.

127 *Phagocytosis of pHrodo Bioparticles.*

128 For opsonization of pHrodo labeled bioparticles, a frozen vial was resuspended in sterile HBSS  
129 containing calcium and magnesium (according to manufacturer's recommendations) and placed  
130 in a water bath sonicator for 15 minutes to fully disperse particles. To opsonize the bioparticles,  
131 an equal volume of human serum was added to the particles and were incubated for 30 minutes  
132 at 37°C. Following opsonization, bioparticles were added to macrophage or neutrophil cultures  
133 at a concentration of 0.08 mg/ml. Neutrophil cultures were gently tumbled for 3 minutes at 37°C  
134 to ensure proper mixing followed by subsequent static incubation. Following a 1 hour incubation  
135 at 37°C, supernatants were aspirated and cells were washed twice with PBS to remove non-  
136 ingested particles. Macrophages were collected by addition of PBS containing 2 mM EDTA to  
137 the cultures and cells were gently lifted using a cell scraper, washed with cell staining buffer  
138 (catalog # 420201, BioLegend), and stored on ice and protected from light<sup>12</sup>. Data were  
139 collected on a Becton Dickinson LSRFortessa flow cytometer and analyses performed with  
140 FlowJo software. Cytochalasin D was added to samples at 2 µM as a control for inhibition of  
141 phagocytosis and was used to draw flow gates to identify the percent of cells negative and  
142 positive for pHrodo red.

143 *Macrophage LPS Stimulation for Western Blot and ELISA*

144 Protein lysates were prepared as previously described<sup>3</sup>. In brief, RIPA lysis buffer containing  
145 protease and phosphatase inhibitors (Life Technologies) were added to cells on ice for 20  
146 minutes. Cell lysates were scraped from the wells, collected into pre-chilled centrifuge tubes and  
147 the lysates were cleared by centrifugation at 14,000 x g for 5 minutes at 4°C. Quantitation of  
148 protein lysates was performed using a BCA assay (Life Technologies), and samples were  
149 prepared in order to load 5-10 ug of total protein per lane of a gel. Supernatants from stimulated  
150 cells were collected and centrifuged at 14,000 x g for 5 minutes to clear cellular debris and  
151 were stored at -80°C prior to ELISA analysis. Human IL-8/CXCL8 and TNF DuoSet ELISA (R&D  
152 Systems) were used to quantify IL-8 and TNF in supernatants.

153 **RESULTS**

154 **Inhibition of the MEK1/2 Pathway Decreases CF Macrophage LPS-Induced IL-1 $\beta$  and IL-8**  
155 **Production.**

156 Production and secretion of IL-1 $\beta$  and IL-8 are thought to be key drivers of inflammation in CF<sup>13</sup>.  
157 To test the hypothesis that MEK1/2 inhibitor compounds would reduce production of pro-IL1 $\beta$   
158 and secretion of IL-8, CF macrophages were stimulated with *P. aeruginosa* LPS in media  
159 containing vehicle or one of the MEK1/2 inhibitor compounds, PD0325901, Trametinib, or CI-  
160 1040. When analyzed 4 hours after stimulation, addition of the MEK1/2 inhibitor compounds  
161 reduced MEK1/2-ERK1/2 pathway activation, as measured by reduced ERK1/2(pT202/pT204)  
162 (Fig. 1A), and the LPS-induced production of pro-IL-1 $\beta$  was also significantly reduced by  
163 addition of a MEK1/2 inhibitor compound compared to vehicle-treated control (Fig. 1A-B).  
164 Further, the LPS-induced secretion of IL-8 (Fig. 1C) and TNF (Fig. 1D) were significantly  
165 reduced by addition of the MEK1/2 inhibitor compounds compared to vehicle-treated samples.  
166 Together, these results demonstrate that MEK1/2 inhibitors are able to significantly reduce CF  
167 macrophage LPS-induction of pro-inflammatory cytokines associated with neutrophil recruitment  
168 and tissue damage.

169 **MEK1/2 Inhibitors Do Not Impair CF Macrophage or Neutrophil Phagocytosis**

170 While production and secretion of cytokine and chemokines by macrophages modulate the  
171 inflammatory response, phagocytosis and phagosome acidification are critical cellular functions  
172 of both macrophage and neutrophils involved in host defense and homeostasis. To determine if  
173 MEK1/2 inhibitors reduced the ability of macrophage to perform these functions on gram-  
174 negative, gram-positive, or fungal microbes, phagocytosis and phagosome acidification were  
175 assayed with serum-opsonized pHrodo-labeled *E. coli* (Fig. 2A,D), *S. aureus* (Fig. 2B,E), or  
176 zymosan (Fig. 2C,F) bioparticles. The pHrodo label requires acidification of the phagosome  
177 compartment to increase fluorescence, therefore detection in this assay is dependent on both

178 bioparticle internalization and phagosome maturation. The addition of cytochalasin-D during the  
179 phagocytosis assay was used as a control and significantly reduced and prevented bioparticle  
180 ingestion, in contrast to vehicle-treated macrophage, which exhibited robust phagocytic abilities  
181 as measured by the percent of macrophages positive for pHrodo-red labeling (Fig. 2 A-F).  
182 Macrophages treated with PD0325901, Trametinib, or CI-1040 did not have significantly  
183 reduced phagocytosis of either opsonized *E. coli* or opsonized *S. aureus* bioparticles compared  
184 to vehicle-treated controls. In addition, the ability of CF neutrophils to phagocytose serum-  
185 opsonized *E. coli* (Fig. 3A) or *S. aureus* (Fig. 3B) pHrodo bioparticles was not impacted by  
186 addition of MEK1/2 inhibitors. Together, these results indicate inhibition of MEK1/2 does not  
187 impact human macrophage or neutrophil phagocytosis or phagosome acidification of opsonized  
188 microbes.

### 189 ***In vivo* MEK1/2 Inhibitor Delivery Does Not Impair Host Defense During MRSA Infection in** 190 **CF Mice**

191 Inhibition of innate immune inflammatory functions may decrease over- exuberant inflammation,  
192 but could result in impaired host defense response during *in vivo* infections<sup>14, 15</sup>. We thus sought  
193 to interrogate whether the anti-inflammatory effects of a MEK1/2 inhibitor compound would  
194 increase bacterial replication or dissemination *in vivo*. Mice were treated i.p. with either vehicle  
195 or PD0325901 immediately prior to intranasal infection with the MRSA strain USA300. At 24  
196 hours after infection, wild-type mice receiving PD0325901-treatment had significantly less  
197 weight loss, an indicator of illness, compared to vehicle-treated animals, which was sustained  
198 through day 4 of infection (Fig. 4A); all mice had returned to similar levels of weight as mock  
199 control on days 5-6 after infection. We next utilized the CF mouse model to determine if  
200 PD0325901 treatment also alleviated weight loss as a marker of illness without impairing  
201 bacterial clearance. Similar to findings with wild-type mice, CF mice receiving PD0325901  
202 treatment experienced significantly less weight loss compared to vehicle treated animals at day  
203 1 after infection (Fig. 4B). At this 1 day timepoint in CF mice, CFU were measured in lung, liver,



204 and spleen homogenates to quantify the bacterial burdens; there were no significant differences  
205 in bacterial clearance in the PD0325901 treated group compared to vehicle treated controls  
206 (Fig. 4C). Together, these results demonstrate that MEK1/2 inhibitor-treatment reduced a key  
207 marker of illness following infection but did not impair bacterial clearance.

208

## 209 **DISCUSSION**

210 Despite the fact that HEMT has significantly improved clinical outcomes and health in many  
211 PwCF, there is still a critical need for novel therapies for people with CF with established lung  
212 disease associated with chronic bacterial infection and inflammation. Access to HEMT therapy  
213 remains restricted based on eligibility of only specific *CFTR* mutations, insurance and  
214 socioeconomic status impact access to HEMT, and HEMT is still not available to PwCF in many  
215 countries. In addition, chronic infections remain challenges in CF, even for PwCF on HEMT.  
216 According to patient registry data, in the USA the prevalence of *S. aureus* infections in PwCF  
217 has been over 60% since 2006<sup>16</sup>. Due to early colonization and high prevalence of respiratory  
218 infections, acquired and intrinsic antimicrobial resistance of airway bacteria are straining our  
219 arsenal of therapeutic options. Novel therapeutic strategies to reduce detrimental inflammatory  
220 responses while combatting infection have major potential to slow pathology in CF, reducing  
221 symptom burden and enhancing patient longevity.

222

223 The unexpected clinical trial results for a previously developed anti-inflammatory therapy for  
224 PwCF highlighted that suppressing specific arms of the inflammatory response can lead to  
225 impaired host defenses, increased growth of *P. aeruginosa*, and increased pulmonary  
226 exacerbations<sup>14, 15</sup>. To address these concerns, experimental anti-inflammatory therapies need  
227 to undergo extensive and rigorous preclinical studies to investigate the potential for impaired  
228 host defense. Our previous studies using non-CF human macrophages and wild-type mice  
229 demonstrated that MEK1/2 inhibitors modulated macrophage polarization *in vitro* and *in vivo*,

230 and mitigated illness in wild-type mice when therapeutically delivered after initiation of  
231 experimental LPS-induced acute lung injury or *P. aeruginosa* pneumonia<sup>3,4</sup>. Other non-CF  
232 models of infection and inflammation demonstrated complementary findings to our results,  
233 supporting the anti-inflammatory therapeutic potential of MEK1/2 inhibitors<sup>5, 17, 18, 19, 20</sup>. However,  
234 to date there have been no studies investigating the effects of MEK1/2 inhibitors on CF immune  
235 cells, and the application of a MEK1/2 inhibitor in preclinical models of pulmonary MRSA  
236 infection has not been reported. This study is the first to investigate the therapeutic potential and  
237 immunomodulatory roles of MEK1/2 inhibitors using human CF macrophages and neutrophils,  
238 and in an experimental murine MRSA infection model in wild-type and CF mice. The results  
239 from this study demonstrated that inhibition of the MEK1/2 pathway decreased LPS-induced  
240 production of IL-1 $\beta$  and secretion of IL-8 by CF macrophages, two key inflammatory mediators  
241 that potentiate tissue damage and recruitment of neutrophils. In addition, the data presented  
242 here indicate that inhibition of the MEK1/2 pathway does not decrease the phagocytic abilities of  
243 CF macrophages and neutrophils or affect phagosome acidification. Finally, the data  
244 demonstrated that administration of a MEK1/2 inhibitor compound to mice at the time of MRSA  
245 infection did not impair bacterial clearance or result in increased dissemination of infection.  
246 Instead, groups of mice treated with the MEK1/2 inhibitor had reduced weight loss as a marker  
247 of illness compared to vehicle-treated groups. These new findings are consistent with previous  
248 reports demonstrating that MEK1/2-ERK1/2 pathway inhibition reduces airway epithelial cell,  
249 including CF epithelial cell, production of IL-8<sup>21, 22</sup>, and that inhibition of the MEK1/2-ERK1/2  
250 pathway can prevent airway epithelial cell CFTR degradation<sup>23, 24</sup>. Combined, these new data  
251 support the hypothesis that MEK1/2 inhibitor compounds exert anti-inflammatory effects without  
252 impairing host defense mechanisms, and thus may have a high potential as therapies for PwCF.  
253  
254 There are several limitations of the current study. First, while the CF mouse model utilized  
255 recapitulates many phenotypes of CF, the mouse does not reproduce all of the aspects of

256 human CF pulmonary disease, such as spontaneous airway disease or have airway acidification  
257 defects. In addition, the MRSA infection employed results in a modest and transient disease,  
258 which does not fully capture the chronic infections commonly found in CF. However, this murine  
259 model is still an important tool for the development of preclinical studies as it models complex  
260 immune cell interactions with bacteria in the lung. Second, while our approach utilized the  
261 MRSA USA300 strain, which is associated with community-acquired human disease, CF clinical  
262 isolates of *S. aureus* may have significant genetic and phenotypic differences to produce  
263 different inflammatory host responses. For example, infection with *S. aureus* small colony  
264 variants (SCV) have been demonstrated to elicit worse outcomes in PwCF and infection induces  
265 an increased inflammatory response compared to non-SCV *S. aureus* infection in the CF rat<sup>25</sup>.  
266 <sup>26</sup>. Overall, the current findings support a rationale for future investigative preclinical studies  
267 utilizing CF models, such as the CF rat<sup>25, 27</sup>, that more faithfully recapitulate CF pulmonary  
268 disease in conjunction with chronic infection or poly-microbial infection.

269  
270 The translational potential of this work is highly relevant, as a recent human clinical trial  
271 (NCT04776044) has tested the therapeutic potential of the MEK1/2 inhibitor compound ATR-  
272 002 in the context of SARS-CoV-2 infection<sup>10</sup>. Future human clinical trials with ATR-002 may  
273 provide additional data to help determine the safety and efficacy of this compound during  
274 human respiratory infections, and could serve as a foundation for evaluating the safety for  
275 translational application in PwCF. Significantly for CF, there is evidence that the ATR-002  
276 compound has direct antibacterial effects on gram-positive organisms, including *S. aureus*<sup>28</sup>.  
277 Future preclinical studies for CF should be designed to harness the combined antimicrobial and  
278 potential anti-inflammatory effects of this MEK1/2 inhibitor compound. In summary, this study  
279 provides the first CF data evaluating the immunomodulatory and therapeutic potential of  
280 MEK1/2 inhibitor compounds. The findings support the hypothesis that inhibition of the MEK1/2  
281 pathway is a therapeutic target to reduce inflammation without impairing cellular and organism

282 level host defense mechanisms. Future preclinical studies to provide additional rigorous  
283 assessment of the impact on inflammation, host defense, and the antimicrobial potential of  
284 MEK1/2 inhibitor compounds should be performed with the goal to developing a path to human  
285 CF translational studies.

286

## 287 **ACKNOWLEDGEMENTS**

288 This work was supported in part by the Cure CF Columbus Translational Core (C3TC). C3TC is  
289 supported by the Division of Pediatric Pulmonary Medicine, the Biopathology Center Core, and  
290 the Data Collaboration Team at Nationwide Children's Hospital. Grant support was provided by  
291 The Ohio State University Center for Clinical and Translational Science (National Center for  
292 Advancing Translational Sciences Grant UL1TR002733, the Cystic Fibrosis Foundation  
293 Research Development Programs MCCOY19RO and SINGH15RO, Cystic Fibrosis Foundation  
294 awards LONG19F5-CI and LONG21R3 to M.E.L., and MANICO19G0 to A.M.M, and the  
295 National Institutes of Health awards K08 HL136786 to K.B.H, K22 AI146141 to E.A.H. and R01  
296 HL144656 to A.M.M. This research was supported by the Flow Cytometry Shared Resource at  
297 The Ohio State University supported by NCI P30CA16058.

298

## 299 **CONFLICT OF INTEREST STATEMENT**

300 The authors do not have any conflicts of interest to declare.

301

302

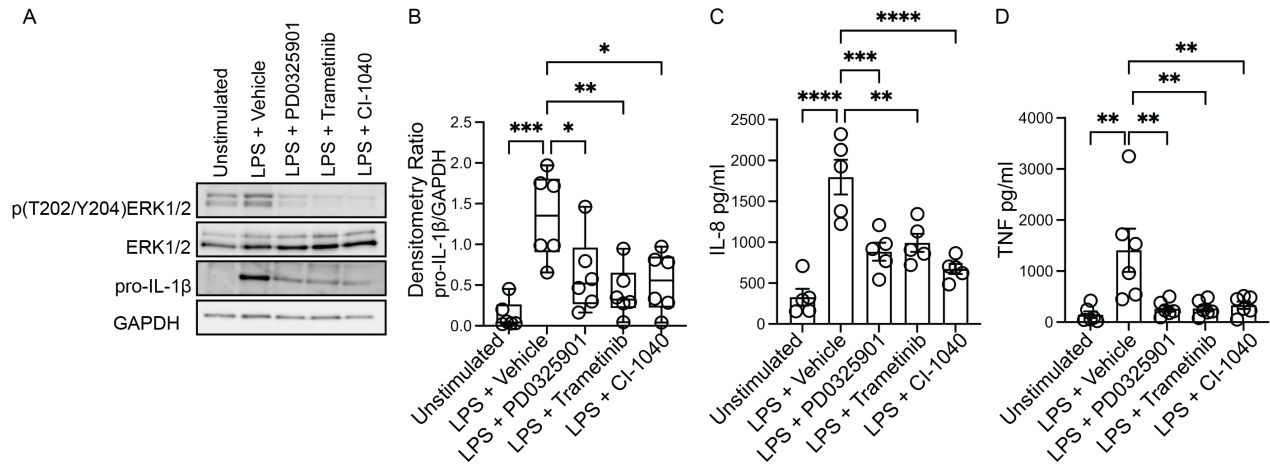

303

304

305 **Figure 1. MEK1/2 inhibitors reduce CF macrophage LPS-induced pro-inflammatory**

306 **responses.** Human CF macrophage were stimulated with 50 ng/ml of *P. aeruginosa* LPS for 4

307 hours. (A) Protein lysates from a representative experiment from one donor, (B) densitometry

308 quantitation of the ratio of pro-IL-1B to GAPDH from n=6 donors. (C) Measurement of the levels

309 of IL-8 or (D) TNF from supernatants collected at 4 hours from n=5-6 donors. (B-D) Data are the

310 mean ± SEM, each point represents one individual donor. Statistical analyses were performed

311 by One-Way ANOVA with Tukey multiple comparisons, \*  $P < 0.05$ , \*\*  $P < 0.01$ , \*\*\*  $P < 0.001$ , \*\*\*\*

312  $P < 0.0001$ .

313

314  
315

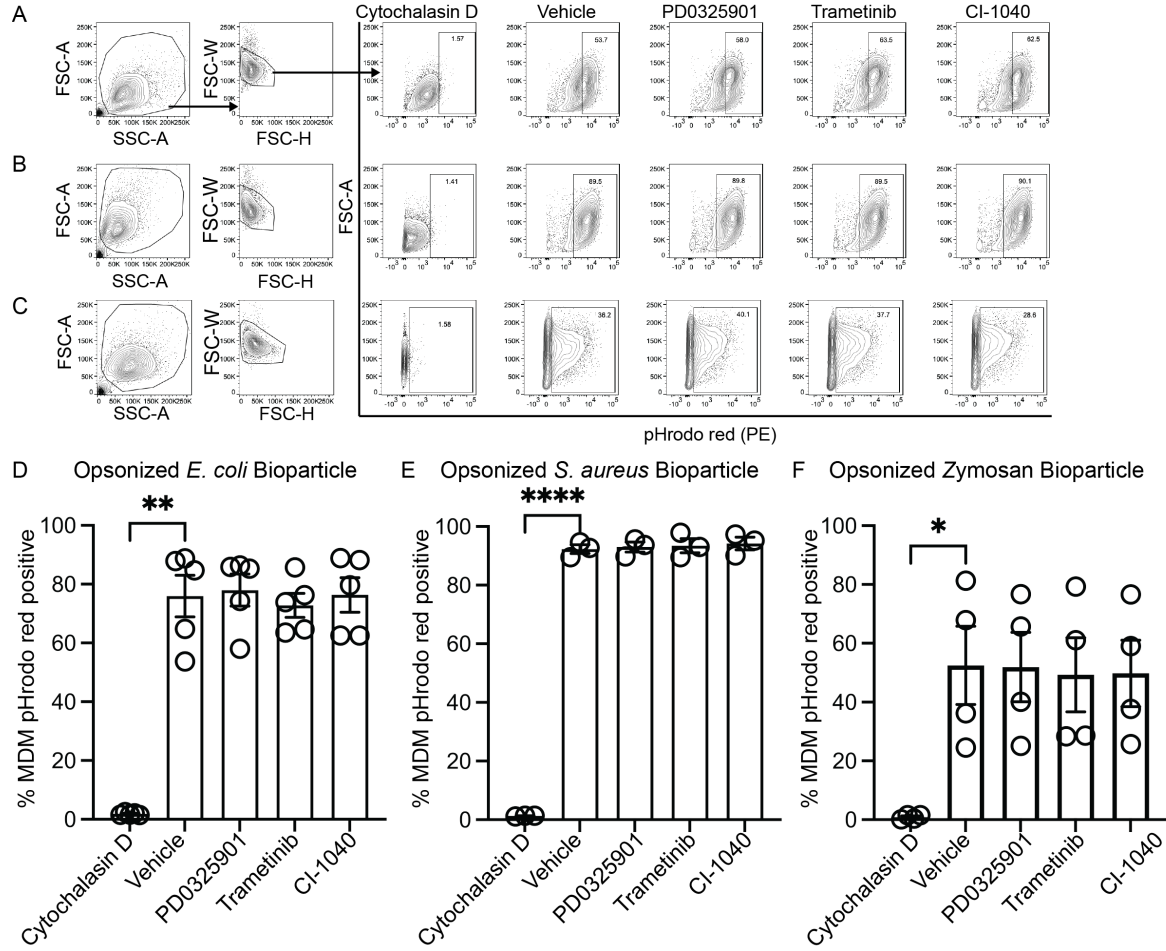

316  
317  
318  
319  
320  
321  
322  
323  
324  
325

**Figure 2. MEK1/2 inhibitors do not impair CF macrophage phagocytosis.** Representative flow cytometry gating used for phagocytosis of (A) pHrodo Red *E. coli* bioparticles, (B) pHrodo Red *S. aureus* bioparticles, or (C) pHrodo Red Zymosan bioparticles. Quantitation of the percent of macrophages positive for pHrodo red fluorescence following incubation with serum opsonized (D) pHrodo Red *E. coli* bioparticles, (E) pHrodo Red *S. aureus* bioparticles, or (F) pHrodo Red Zymosan bioparticles. Data are the mean  $\pm$  SEM and each point represents data from one individual donor. Statistical analyses were performed by One-Way ANOVA with Tukey multiple comparisons, \*  $P<0.05$ , \*\*  $P<0.01$ , \*\*\*\*  $P<0.0001$ .

A Oposonized *E. coli* Bioparticle      B Oposonized *S. aureus* Bioparticle

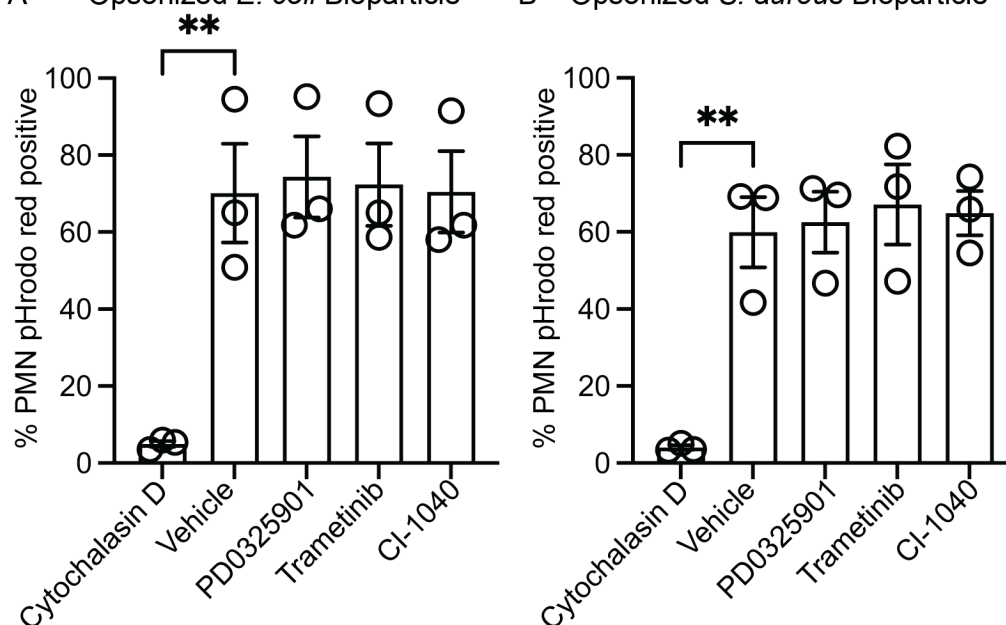

326  
327 **Figure 3. MEK1/2 inhibitors do not impair CF neutrophil phagocytosis.** Quantitation of the  
328 percent of neutrophils positive for pHrodo red fluorescence following incubation with opsonized  
329 (A) pHrodo red *E. coli* bioparticles or (B) pHrodo red *S. aureus* bioparticles. Data are the mean  
330  $\pm$  SEM and each point represents one individual donor. Statistical analyses were performed by  
331 One-Way ANOVA with Tukey multiple comparisons\*\*  $P < 0.01$ .  
332

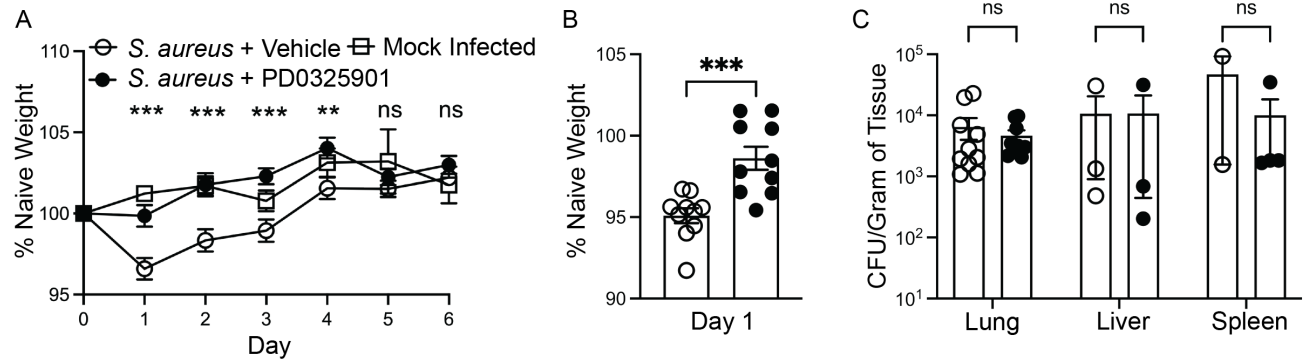

333  
334 **Figure 4. MEK1/2 inhibitor administration does not impair host defense of CF mice during**  
335 ***S. aureus* infection.** Anesthetized mice were provided i.p. treatment with 20 mg/kg PD0325901  
336 (black filled circles) or vehicle control (open circles) immediately prior to intranasal inoculation  
337 with  $1 \times 10^7$  CFU of *S. aureus* USA300. (A) Weight loss of C57BL6/J mice was measured  
338 following infection or mock infection for six days. Data are the mean  $\pm$  SEM from n=5 males and  
339 n=5 females for each infected treatment group, and n=4 total for mock infected. (B) Weight loss  
340 of *Cfr<sup>tm1kth</sup> F508del* homozygous mice following infection. Data points represent an individual  
341 mouse and are combined from three independent experiments, n=5 males and n=5 females for  
342 each treatment group. (C) Tissue homogenates from lung, liver, and spleen were used to  
343 enumerate total colony forming units (CFU) and normalized per gram of tissue collected. Each  
344 data point is from an individual mouse; data points and were omitted from the graphs if the CFU  
345 recovery was below the limit of detection (99 CFU/ml in a single spot). Statistical analysis were  
346 performed with (A) Two-Way ANOVA with multiple comparisons, (B) Unpaired t-test, and (C)  
347 multiple unpaired t-tests; \*\* $P < 0.01$ , \*\*\* $P < 0.001$ , ns not significant.

348  
349



350  
351

Supplemental Table 1: List of antibodies used for western blot.

| Target                             | Company        | Species | Catalog # |
|------------------------------------|----------------|---------|-----------|
| GAPDH (14C10)                      | Cell Signaling | Rabbit  | 2118      |
| P44/42 MAPK (ERK1/2) (137F5)       | Cell Signaling | Rabbit  | 4695      |
| p-P44/42 MAPK (ERK1/2) (T202/Y204) | Cell Signaling | Rabbit  | 9101      |
| IL-1 $\beta$ (D3U3E)               | Cell Signaling | Rabbit  | 12703     |

352  
353

## REFERENCES

- 354 1. Hisert, K.B. *et al.* Restoring Cystic Fibrosis Transmembrane Conductance Regulator  
355 Function Reduces Airway Bacteria and Inflammation in People with Cystic Fibrosis  
356 and Chronic Lung Infections. *Am J Respir Crit Care Med* **195**, 1617-1628 (2017).  
357
- 358 2. Rosen, B.H. *et al.* Infection Is Not Required for Mucoinflammatory Lung Disease in  
359 CFTR-Knockout Ferrets. *Am J Respir Crit Care Med* **197**, 1308-1318 (2018).  
360
- 361 3. Long, M.E. *et al.* MEK1/2 Inhibition Promotes Macrophage Reparative Properties. *J*  
362 *Immunol* **198**, 862-872 (2017).  
363
- 364 4. Long, M.E., Gong, K.Q., Eddy, W.E., Liles, W.C. & Manicone, A.M. Pharmacologic  
365 inhibition of MEK1/2 reduces lung inflammation without impairing bacterial  
366 clearance in experimental *Pseudomonas aeruginosa* pneumonia. *Pneumonia*  
367 (*Nathan*) **9**, 13 (2017).  
368
- 369 5. Schuh, K. & Pahl, A. Inhibition of the MAP kinase ERK protects from  
370 lipopolysaccharide-induced lung injury. *Biochem Pharmacol* **77**, 1827-1834 (2009).  
371
- 372 6. Zhao, Y. & Adjei, A.A. The clinical development of MEK inhibitors. *Nat Rev Clin Oncol*  
373 **11**, 385-400 (2014).  
374
- 375 7. Roskoski, R., Jr. Properties of FDA-approved small molecule protein kinase  
376 inhibitors: A 2023 update. *Pharmacol Res* **187**, 106552 (2022).  
377
- 378 8. Droebner, K., Pleschka, S., Ludwig, S. & Planz, O. Antiviral activity of the MEK-  
379 inhibitor U0126 against pandemic H1N1v and highly pathogenic avian influenza  
380 virus in vitro and in vivo. *Antiviral Res* **92**, 195-203 (2011).  
381
- 382 9. Schreiber, A. *et al.* The MEK1/2 Inhibitor ATR-002 (Zapnometinib) Synergistically  
383 Potentiates the Antiviral Effect of Direct-Acting Anti-SARS-CoV-2 Drugs.  
384 *Pharmaceutics* **14** (2022).  
385
- 386 10. Schreiber, A. *et al.* The MEK1/2-inhibitor ATR-002 efficiently blocks SARS-CoV-2  
387 propagation and alleviates pro-inflammatory cytokine/chemokine responses. *Cell*  
388 *Mol Life Sci* **79**, 65 (2022).  
389

- 390 11. Nauseef, W.M. Isolation of human neutrophils from venous blood. *Methods Mol Biol*  
391 **1124**, 13-18 (2014).  
392
- 393 12. Gharib, S.A. *et al.* Transcriptional and functional diversity of human macrophage  
394 repolarization. *J Allergy Clin Immunol* **143**, 1536-1548 (2019).  
395
- 396 13. Roesch, E.A., Nichols, D.P. & Chmiel, J.F. Inflammation in cystic fibrosis: An update.  
397 *Pediatr Pulmonol* **53**, S30-S50 (2018).  
398
- 399 14. Doring, G. *et al.* BIIL 284 reduces neutrophil numbers but increases *P. aeruginosa*  
400 bacteremia and inflammation in mouse lungs. *J Cyst Fibros* **13**, 156-163 (2014).  
401
- 402 15. Konstan, M.W. *et al.* A randomized double blind, placebo controlled phase 2 trial of  
403 BIIL 284 BS (an LTB4 receptor antagonist) for the treatment of lung disease in  
404 children and adults with cystic fibrosis. *J Cyst Fibros* **13**, 148-155 (2014).  
405
- 406 16. Cystic Fibrosis Foundation Patient Registry. 2021 Annual Data Report; 2022.  
407
- 408 17. Shi-Lin, D., Yuan, X., Zhan, S., Luo-Jia, T. & Chao-Yang, T. Trametinib, a novel MEK  
409 kinase inhibitor, suppresses lipopolysaccharide-induced tumor necrosis factor  
410 (TNF)-alpha production and endotoxin shock. *Biochem Biophys Res Commun* **458**,  
411 667-673 (2015).  
412
- 413 18. Saint, R.J., D'Elia, R.V., Bryant, C., Clark, G.C. & Atkins, H.S. Mitogen-activated protein  
414 kinases (MAPKs) are modulated during *Francisella tularensis* infection, but  
415 inhibition of extracellular-signal-regulated kinases (ERKs) is of limited therapeutic  
416 benefit. *Eur J Clin Microbiol Infect Dis* **35**, 2015-2024 (2016).  
417
- 418 19. Smith, J.A., Mayeux, P.R. & Schnellmann, R.G. Delayed Mitogen-Activated Protein  
419 Kinase/Extracellular Signal-Regulated Kinase Inhibition by Trametinib Attenuates  
420 Systemic Inflammatory Responses and Multiple Organ Injury in Murine Sepsis. *Crit*  
421 *Care Med* **44**, e711-720 (2016).  
422
- 423 20. Yu, K.E. *et al.* Enhancement of Impaired MRSA-Infected Fracture Healing by  
424 Combinatorial Antibiotics and Modulation of Sustained Inflammation. *J Bone Miner*  
425 *Res* **37**, 1352-1365 (2022).  
426
- 427 21. Cormet-Boyaka, E. *et al.* An NF-kappaB-independent and Erk1/2-dependent  
428 mechanism controls CXCL8/IL-8 responses of airway epithelial cells to cadmium.  
429 *Toxicol Sci* **125**, 418-429 (2012).  
430
- 431 22. Bhattacharyya, S. *et al.* MAPK signaling pathways regulate IL-8 mRNA stability and  
432 IL-8 protein expression in cystic fibrosis lung epithelial cell lines. *Am J Physiol Lung*  
433 *Cell Mol Physiol* **300**, L81-87 (2011).  
434

- 435 23. Wellmerling, J. *et al.* Targeting the EGFR-ERK axis using the compatible solute  
436 ectoine to stabilize CFTR mutant F508del. *FASEB J* **36**, e22270 (2022).  
437
- 438 24. Xu, X. *et al.* Cigarette smoke exposure reveals a novel role for the MEK/ERK1/2  
439 MAPK pathway in regulation of CFTR. *Biochim Biophys Acta* **1850**, 1224-1232  
440 (2015).  
441
- 442 25. Bollar, G.E., Keith, J.D., Oden, A.M., Kiedrowski, M.R. & Birket, S.E. Acute Infection  
443 with a Tobramycin-Induced Small Colony Variant of *Staphylococcus aureus* Causes  
444 Increased Inflammation in the Cystic Fibrosis Rat Lung. *Infect Immun* **90**, e0023722  
445 (2022).  
446
- 447 26. Wolter, D.J. *et al.* *Staphylococcus aureus* small-colony variants are independently  
448 associated with worse lung disease in children with cystic fibrosis. *Clin Infect Dis* **57**,  
449 384-391 (2013).  
450
- 451 27. Henderson, A.G. *et al.* Static mucus impairs bacterial clearance and allows chronic  
452 infection with *Pseudomonas aeruginosa* in the cystic fibrosis rat. *Eur Respir J* (2022).  
453
- 454 28. Bruchhagen, C. *et al.* Metabolic conversion of CI-1040 turns a cellular MEK-inhibitor  
455 into an antibacterial compound. *Sci Rep* **8**, 9114 (2018).  
456  
457
